# Supplementary material for: C-Doped KNbO3 single crystals for enhanced piezocatalytic intermediate water splitting
Source: Royal Society of Chemistry journal article supplement (doi:10.1039/d2en00244b), 2022-01-01
Supplement: d2en00244b1.pdf [file d2en00244b1.pdf]

## SUPPORTING INFORMATION

### **C-doped KNbO<sub>3</sub> Single Crystals for Enhanced Piezocatalytic Intermediate Water Splitting**

*Jiaqing He <sup>a</sup>, Feng Gao <sup>a</sup>, Haowei Wang <sup>a</sup>, Fangyan Liu <sup>a</sup>, Jiahui Lin <sup>a</sup>, Biao Wang <sup>a</sup>,  
Chuan Liu <sup>c</sup>, Feng Huang <sup>a</sup>, Zhang Lin <sup>b</sup> and Mengye Wang <sup>\*a</sup>*

<sup>a</sup> School of Materials, Sun Yat-Sen University, Shenzhen 518107; State Key Laboratory of Optoelectronic Materials and Technologies, Sun Yat-Sen University, Guangzhou 510275, China.

<sup>b</sup> School of Metallurgy and Environment, Central South University, Changsha, Hunan, 410083.  
School of Environment and Energy, Guangdong Provincial Key Laboratory of Solid Wastes Pollution Control and Recycling, South China University of Technology, Guangzhou 510006, China.

<sup>c</sup> The Guangdong Province Key Laboratory of Display Material and Technology, School of Electronics and Information Technology, Sun Yat-Sen University, Guangzhou 510275, China.

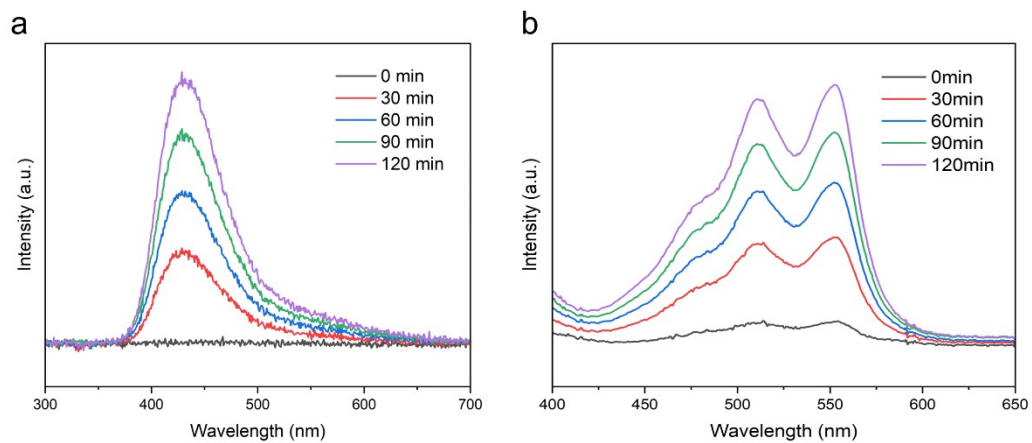

**Figure S1.** (a) PL spectra and (b) UV-vis spectra of solution obtained from the piezocatalytic system using 0.5:1 C-KNbO<sub>3</sub> as the catalysts.

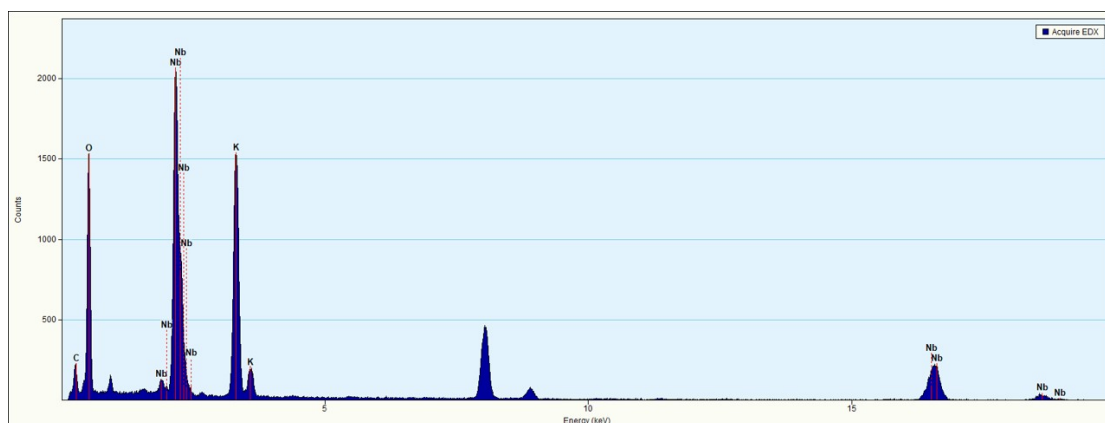

**Figure S2.** EDS spectrum of 0.5:1 C-KNbO<sub>3</sub>.

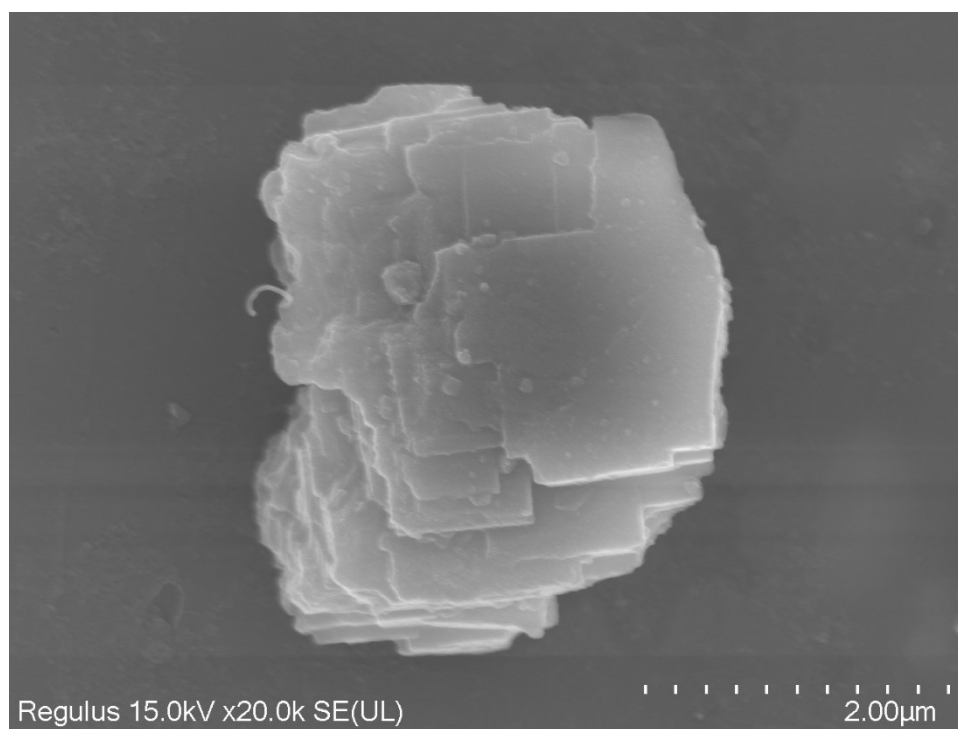

**Figure S3.** SEM images of 0.5:1 C-KNbO<sub>3</sub> after the piezocatalytic reduction of AgNO<sub>3</sub>.

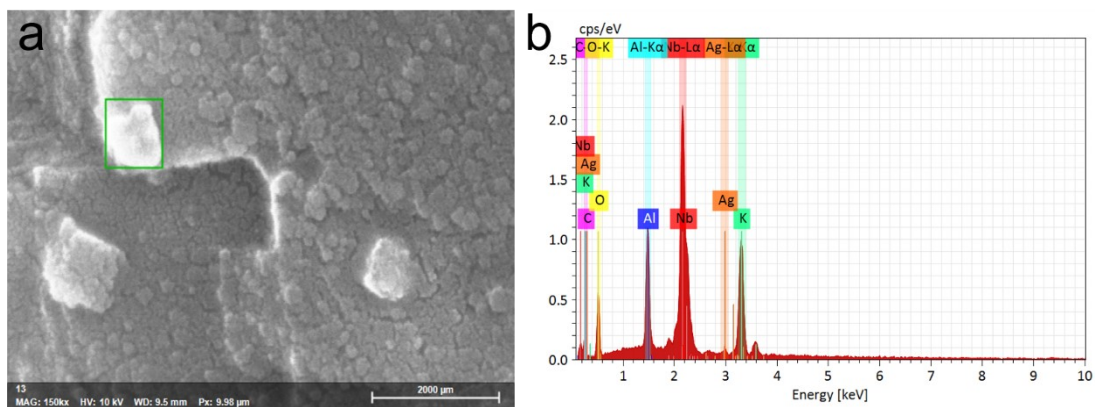

**Figure S4.** EDS measurement of nanoparticles from (110) plane. The elements C, K, Nb, and O come from 0.5:1 C-KNbO<sub>3</sub>. Al might be attributed to the tin foil used to bearing the dispersed samples. It is confirmed that nanoparticles are Ag.

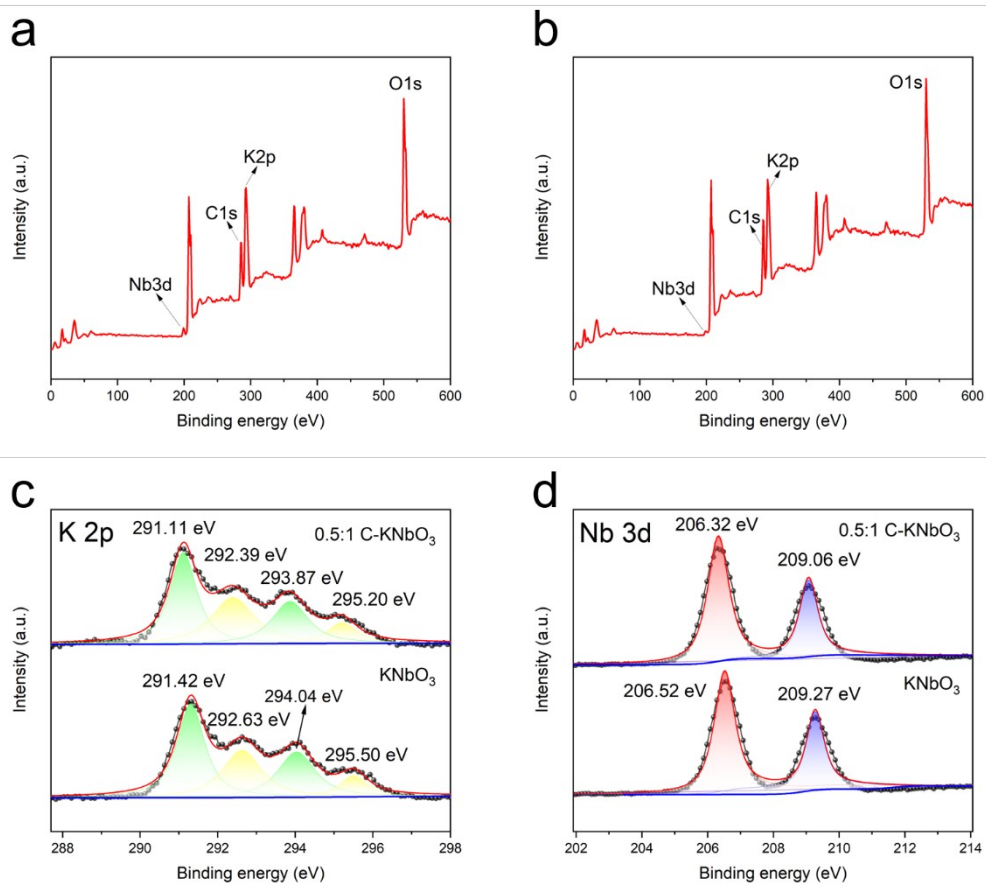

Figure S5. XPS survey spectra of (a)  $\text{KNbO}_3$  and (b)  $0.5:1 \text{ C-KNbO}_3$ . High-resolution XPS spectra of (c) K 2p and (d) Nb 3d of  $\text{KNbO}_3$  and  $0.5:1 \text{ C-KNbO}_3$ .

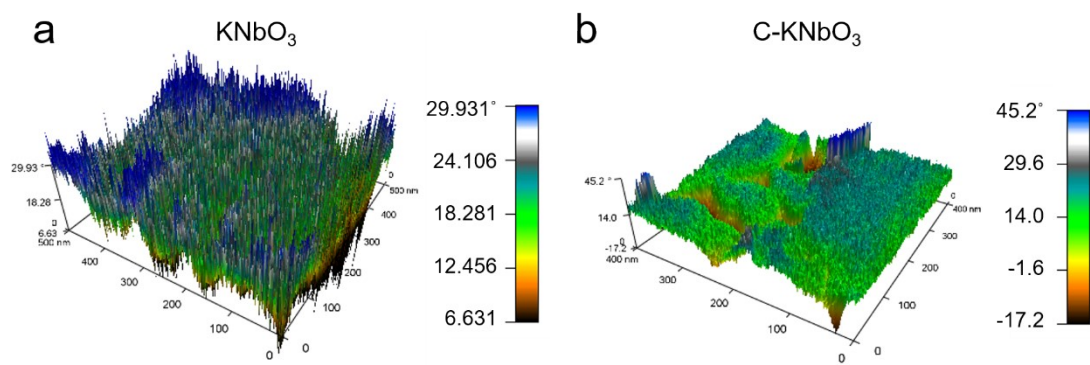

Figure S6. PFM phase of (a)  $\text{KNbO}_3$  and (b) 0.5:1  $\text{C-KNbO}_3$ .
