# Supplementary figures and images for: C-Doped KNbO3 single crystals for enhanced piezocatalytic intermediate water splitting
Source: Royal Society of Chemistry journal article supplement (doi:10.1039/d2en00244b), 2022-01-01

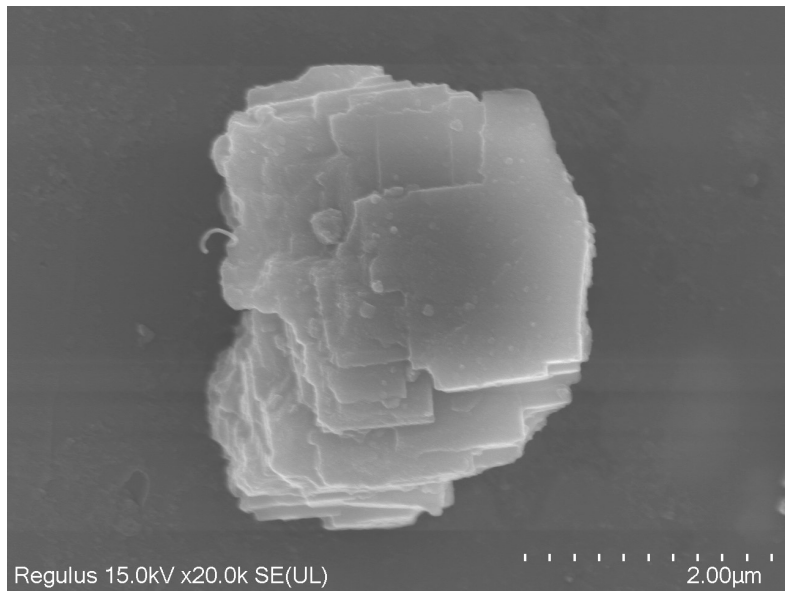

Supplement: d2en00244b5.pdf [file d2en00244b5.pdf]
